# Supplementary material for: Neuronal Activity Regulates Hippocampal miRNA Expression
Source: PLoS One. 2011 Oct 3;6(10):e25068. doi: 10.1371/journal.pone.0025068 (PMC3184962; doi:10.1371/journal.pone.0025068)
Supplement: Table S1 — Summary of the mapping of reads. “Non-matching” reads were unable to be mapped to genome following removal of the adapter sequences. “Trimmed 3′ end” are reads that matched to the genome after trimming all but the 20 nt of the 5′ end of the read. “Perfect” refers to reads that match perfectly in the genome following removal of adapter sequence. (XLS) [file pone.0025068.s003.xls]

## Sheet: Sheet 1 - Table 1
Library	Non-matching	Trimmed 3’ end	Perfect	Total mapped
NT-1	1667466	262353	1744478	2006831
NT-2	2252690	821546	4500507	5322053
0.5h-1	3612730	618828	2060635	2679463
0.5h-2	2400194	1190958	4066070	5257028
1h-1	3566897	616139	1696717	2312856
1h-2	1912881	885213	4070899	4956112
3h-1	2611979	493359	1816702	2310061
3h-2	2349835	963795	4288142	5251937
6h-1	3350697	370925	641232	1012157
6h-2	310496	207474	1379520	1586994
24h-1	3557762	751108	2484062	3235170
24h-2	2125408	885890	4274305	5160195
